# Supplementary material for: SIRT5-related desuccinylation modification of AIFM1 protects against compression-induced intervertebral disc degeneration by regulating mitochondrial homeostasis
Source: PubMed Central journal article supplement (PMC9898264; doi:10.1038/s12276-023-00928-y), 2023-01-18
Supplement: 12276_2023_928_MOESM1_ESM.pdf [file 12276_2023_928_MOESM1_ESM.pdf]

Supplementary figure and tables

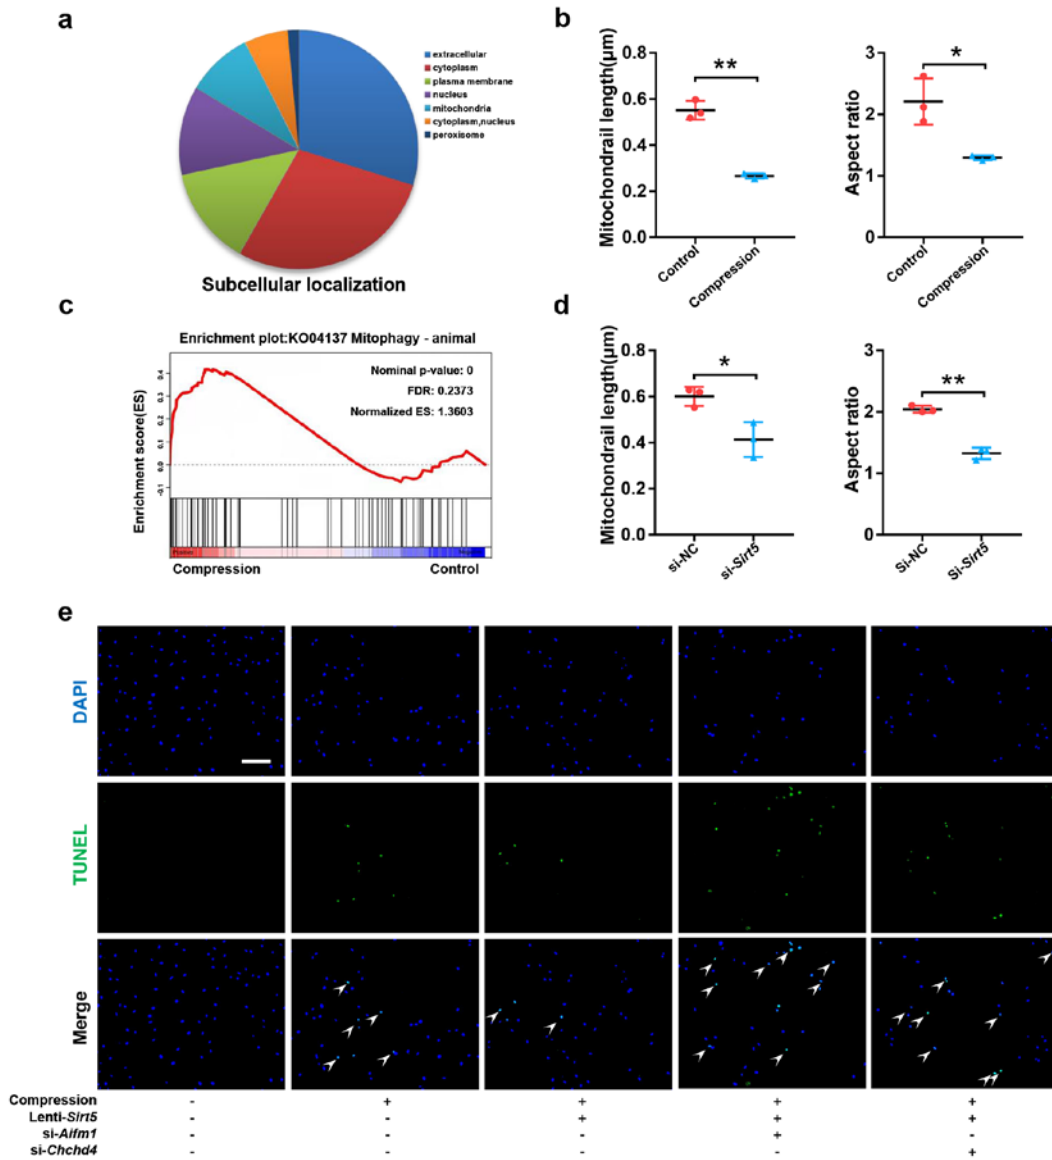

**Supplementary Fig. 1** a Subcellular localization of differentially expressed proteins derived from quantitative proteomics data. RNAseq analysis was performed in rat NP cells. b d Quantitative analysis of mitochondrial length and aspect ratio within NP cells (the average value of all mitochondria in the cell) among groups as indicated(n=3). c KEGG showed that mitophagy was enriched in NP cells under compression. e TUNEL staining of NP cells. Scale bar: 100 µm (n = 5). The data in the figures represent the mean ± S.D. \* $P < 0.05$ , \*\* $P < 0.01$ .

**Supplementary Table 1. Demographic data of patients.**

| Patients NO.              | Age | Gender | Level | Pfirschmann grading |
|---------------------------|-----|--------|-------|---------------------|
| <b>Grade II/III group</b> |     |        |       |                     |
| 1                         | 45  | M      | L3/4  | 2                   |
| 2                         | 37  | M      | L4/5  | 3                   |
| 3                         | 51  | F      | L3/4  | 3                   |
| 4                         | 53  | F      | L4/5  | 2                   |
| 5                         | 34  | F      | L5/S1 | 2                   |
| 6                         | 57  | M      | L4/5  | 3                   |
| 7                         | 65  | F      | L3/4  | 3                   |
| 8                         | 43  | M      | L3/4  | 3                   |
| 9                         | 53  | F      | L4/5  | 3                   |
| 10                        | 29  | M      | L4/5  | 2                   |
| <b>Grade IV/V group</b>   |     |        |       |                     |
| 11                        | 34  | M      | L5/S1 | 4                   |
| 12                        | 61  | F      | L4/5  | 4                   |
| 13                        | 42  | F      | L5/S1 | 5                   |
| 14                        | 59  | F      | L3/4  | 4                   |
| 15                        | 72  | M      | L5/S1 | 5                   |
| 16                        | 68  | F      | L4/5  | 5                   |
| 17                        | 54  | M      | L4/5  | 5                   |
| 18                        | 38  | F      | L4/5  | 4                   |

**Supplementary Table 2. primers of Genotype**

| Primer              | Sequence (5'→3')       | Primer Type |
|---------------------|------------------------|-------------|
| <i>Sirt5 Ko Mut</i> | TGCCTGGGGTTGGGGTGTG    | Forward     |
|                     | TGGTGGGGTCTGTGGGAGGAAC | Reverse     |
| <i>Sirt5 Ko Wt</i>  | CCAGTGGCAGGAAGAGC      | Forward     |
|                     | TGAGCCACATTGAACACAT    | Reverse     |
| Genotype            | Ko=402bp    Wt=605bp   |             |

**Supplementary Table 3. Sequences of siRNA**

| Name              | sense (5'-3')         | antisense (5'-3')     |
|-------------------|-----------------------|-----------------------|
| si- <i>Sirt5</i>  | GCAAUGUUGCUGAGAACUATT | UAGUUCUCAGCAACAUGCTT  |
| si- <i>Aifm1</i>  | GGCUGGAAAUAGAUUCCGATT | UCGGAAUCUAUUUCCAGCCTT |
| si- <i>Chchd4</i> | GGAAGGAUCGAAUCAUAUUTT | AAUAUGAUUCGAUCCUUCCTT |

**Supplementary Table 4. Sequences of primers used for qRT-PCR**

| Gene (Rat)    | Sequence (5'-3') |                         |
|---------------|------------------|-------------------------|
| <i>Sirt5</i>  | Forward          | CCTTTTGCAGCCTGCCC       |
|               | Reverse          | TGCGTTCGCAAACACTTCC     |
| <i>Atp5mg</i> | Forward          | AAACGTGGCATTGTTGGCTA    |
|               | Reverse          | CAGTGTAACAAAGCCAAAGACGA |
| <i>Map2k2</i> | Forward          | TGCCAAGGAACTAGAGGCCA    |
|               | Reverse          | CTGTCCATCCCATGACCACTG   |
| <i>Oxct1</i>  | Forward          | TGTGCCTGCTACTTTTCCGT    |
|               | Reverse          | CACAACCCGAAACCACCAAC    |
| <i>Prdx3</i>  | Forward          | CACTCCGTTTGGTAAAGGCG    |
|               | Reverse          | TGTTGGACTTGGCTTGATCGTA  |
| <i>Pitrm1</i> | Forward          | TACTGGGACAAGCCTAGGGA    |
|               | Reverse          | CAAAACCTTTCTCTGGTAAGAGG |
